# Supplementary material for: Impact of Cachexia on Chemotherapy Efficacy and Survival in Pancreatic Cancer: A Systematic Review and Meta-Analysis
Source: PubMed Central journal article supplement — Cancer Control. 2024 Oct 14;31:10732748241292784. doi: 10.1177/10732748241292784 (PMC11483828; doi:10.1177/10732748241292784), 2024-10-14
Supplement: sj-pdf-1-ccx-10.1177_10732748241292784.pdf [file sj-pdf-1-ccx-10.1177_10732748241292784.pdf]

**Supplementary Figure 01: Risk of Bias interpretation of included Retrospective observational studies (ROS) and cohorts by Newcastle Ottawa quality assessment scale.**

| First author           | Newcastle Ottawa Quality Assessment Scale |   |   |   |               |   |         |   |   | Score | Meta analysis |          |
|------------------------|-------------------------------------------|---|---|---|---------------|---|---------|---|---|-------|---------------|----------|
|                        | Selection                                 |   |   |   | Comparability |   | Outcome |   |   |       | Eligible      | selected |
| Kana Hosokawa, MD 2023 | *                                         | * | * | * | /             | * | *       | * | / | 7     | Yes           | Yes      |
| Yukari Suzuki 2023     | *                                         | / | * | * | *             | * | *       | * | * | 8     | Yes           | Yes      |
| Ya-Chin Hou 2022       | *                                         | * | * | * | /             | * | *       | / | * | 7     | Yes           | Yes      |
| Tsuyoshi Takeda 2021   | *                                         | * | * | / | *             | * | *       | / | * | 7     | Yes           | Yes      |
| Yusuke Kurita 2019     | *                                         | * | * | * | /             | * | *       | / | * | 7     | Yes           | Yes      |
| Henry C. Y. Wong 2019  | *                                         | * | * | * | *             | * | /       | * | / | 7     | Yes           | Yes      |
| Junji Furuse 2023      | *                                         | / | * | * | *             | * | *       | / | * | 8     | Yes           | Yes      |

| Newcastle-Ottawa Quality Assessment Scale |   |                                                                                                        |
|-------------------------------------------|---|--------------------------------------------------------------------------------------------------------|
| Selection:                                | 1 | Representation of the intervention cohort?                                                             |
|                                           | 2 | Selection of the non-intervention cohort?                                                              |
|                                           | 3 | Has the correct intervention been utilized?                                                            |
|                                           | 4 | Definition of intervention?                                                                            |
| Comparability                             | 5 | Are the cohorts comparable based on the basis of the design or analysis: age, sex and injury severity? |
|                                           | 6 | Are the cohorts comparable on the basis of the design or analysis?<br>Additional factors               |
| Outcome:                                  | 7 | Was the outcome assessed?                                                                              |
|                                           | 8 | Was the follow up long enough for measured outcomes to occur?                                          |
|                                           | 9 | Was the cohort follow up long enough?                                                                  |





## Supplementary figure 06

### Statistics table for overall survival

| Model  | Number Studies | Effect size and 95% confidence interval |                |          | Test of null (2-Tail) |             | Heterogeneity |         |         | Tau-squared |         |           |             |                |          |       |
|--------|----------------|-----------------------------------------|----------------|----------|-----------------------|-------------|---------------|---------|---------|-------------|---------|-----------|-------------|----------------|----------|-------|
|        |                | Point estimate                          | Standard error | Variance | Lower limit           | Upper limit | Z-value       | P-value | Q-value | df (Q)      | P-value | I-squared | Tau Squared | Standard Error | Variance | Tau   |
| Fixed  | 5              | -1.593                                  | 0.094          | 0.009    | -1.778                | -1.408      | -16.903       | 0.000   | 209.201 | 4           | 0.000   | 98.088    | 2.607       | 2.116          | 4.478    | 1.615 |
| Random | 5              | -2.338                                  | 0.731          | 0.534    | -3.770                | -0.906      | -3.199        | 0.001   |         |             |         |           |             |                |          |       |

## Supplementary figure 07

### Forest plot illustrating sensitivity analysis by leave-one-out for Overall survival

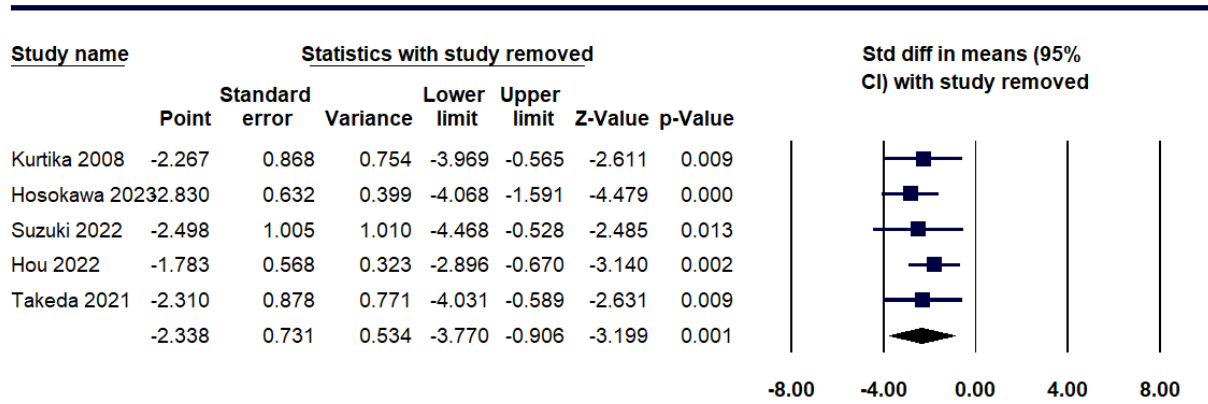

Overall survival (OS)

## Supplementary figure 08

Statistics Table for country of origin Meta-Regression.

### Main results for Model 1, Random effects (MM), Z-Distribution, Std diff in means

| Covariate       | Coefficient | Standard Error | 95% Lower | 95% Upper | Z-value | 2-sided P-value |
|-----------------|-------------|----------------|-----------|-----------|---------|-----------------|
| Intercept       | -1.7831     | 0.5679         | -2.8962   | -0.6700   | -3.14   | 0.0017          |
| country: Taiwan | -2.7450     | 1.2763         | -5.2464   | -0.2436   | -2.15   | 0.0315          |

#### Statistics for Model 1

Test of the model: Simultaneous test that all coefficients (excluding intercept) are zero

$Q = 4.63$ ,  $df = 1$ ,  $p = 0.0315$

Goodness of fit: Test that unexplained variance is zero

$\tau^2 = 1.2306$ ,  $\tau = 1.1093$ ,  $I^2 = 96.26\%$ ,  $Q = 80.21$ ,  $df = 3$ ,  $p = 0.0000$

#### Comparison of Model 1 with the null model

Total between-study variance (intercept only)

$\tau^2 = 2.6074$ ,  $\tau = 1.6147$ ,  $I^2 = 98.09\%$ ,  $Q = 209.20$ ,  $df = 4$ ,  $p = 0.0000$

Proportion of total between-study variance explained by Model 1

$R^2$  analog = 0.53

Number of studies in the analysis 5

## Supplementary figure 09

Statistics table for age Meta-Regression.

### Main results for Model 1, Random effects (MM), Z-Distribution, Std diff in means

| Covariate | Coefficient | Standard Error | 95% Lower | 95% Upper | Z-value | 2-sided P-value |
|-----------|-------------|----------------|-----------|-----------|---------|-----------------|
| Intercept | -4.6510     | 12.8116        | -29.7612  | 20.4593   | -0.36   | 0.7166          |
| age       | 0.0325      | 0.1799         | -0.3201   | 0.3851    | 0.18    | 0.8566          |

#### Statistics for Model 1

Test of the model: Simultaneous test that all coefficients (excluding intercept) are zero

Q = 0.03, df = 1, p = 0.8566

Goodness of fit: Test that unexplained variance is zero

Tau<sup>2</sup> = 3.5428, Tau = 1.8822, I<sup>2</sup> = 98.41%, Q = 189.25, df = 3, p = 0.0000

#### Comparison of Model 1 with the null model

Total between-study variance (intercept only)

Tau<sup>2</sup> = 2.6074, Tau = 1.6147, I<sup>2</sup> = 98.09%, Q = 209.20, df = 4, p = 0.0000

Proportion of total between-study variance explained by Model 1

R<sup>2</sup> analog = 0.00 (computed value is -0.36)

Number of studies in the analysis 5
